# Supplementary material
Source: Royal Society of Chemistry journal article supplement (doi:10.1039/d5fo04017e)
Supplement: d5fo04017e1.pdf [file d5fo04017e1.pdf]

**Table S1** Differences in acute hangover scale between the sample and placebo groups (FAS)

| Variables           | Sample<br>(n=30) | Placebo<br>(n=30) | p-value <sup>1)</sup> |
|---------------------|------------------|-------------------|-----------------------|
| Total score         | 8.07±7.32        | 8.87±8.19         | 0.5971                |
| Hangover            | 1.07±1.68        | 1.20±1.47         | 0.6737                |
| Thirst              | 1.77±1.57        | 1.83±1.84         | 0.8438                |
| Tired               | 2.20±1.73        | 2.50±1.78         | 0.4546                |
| Headache            | 1.10±1.77        | 1.30±1.93         | 0.5575                |
| Dizziness/faintness | 0.20±0.61        | 0.23±0.63         | 0.8130                |
| Loss of appetite    | 0.37±0.76        | 0.47±0.90         | 0.3256                |
| Stomachache         | 0.30±0.70        | 0.47±1.20         | 0.4752                |
| Nausea              | 0.70±1.32        | 0.57±1.01         | 0.5803                |
| Heart racing        | 0.37±1.00        | 0.30±0.99         | 0.4888                |

Sample: 4.5% SKE, 5% glucose, 0.15% citrus flavor, and 0.04% enzymatically modified stevia mixture;  
Placebo: 0.09% caramel color, 0.15% citrus flavor, and 0.04% enzymatically modified stevia mixture.

Data values were expressed as mean ± SD.

<sup>1)</sup>Analyzed using Paired t-test (Compared between groups).

**Table S2** Flavonoid content of SKE

| (ppm)      | SKE           |
|------------|---------------|
| Ampelopsin | 137.58 ± 0.41 |
| Hesperidin | 25.01 ± 0.09  |
| Narirutin  | 99.75 ± 0.16  |

SKE: *Citrus unshiu* fruit vinegar and *Hovenia dulcis* fruit extract mixture

Data values were expressed as mean ± SEM (n=3).

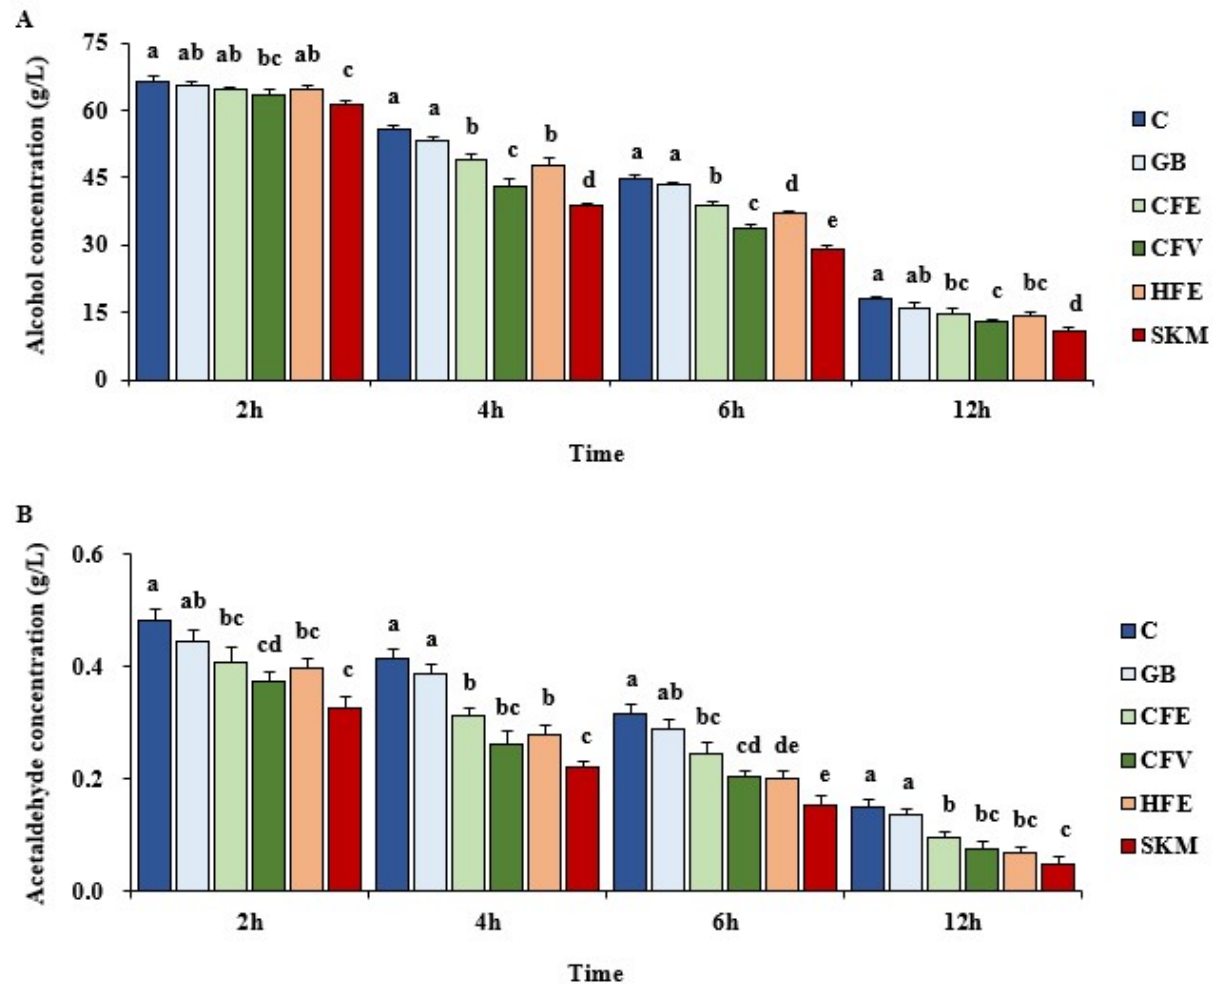

**Fig. S1** Effects of SK on serum alcohol and acetaldehyde concentrations in acute alcohol-fed rats. (A) Alcohol concentration in serum. (B) Acetaldehyde concentration in serum. C: alcohol group; GB: glucose group; CFE: *Citrus unshiu* fruit extract; CFV: *Citrus unshiu* fruit extract fermented vinegar group; HFE: *Hovenia dulcis* fruit extract group; SKM: *Citrus unshiu* fruit

vinegar, *Hovenia dulcis* fruit extract, and glucose mixture group. Data were expressed as mean  $\pm$  SEM (n=8) and analyzed by one-way ANOVA followed by Duncan's test ( $p < 0.05$ ).

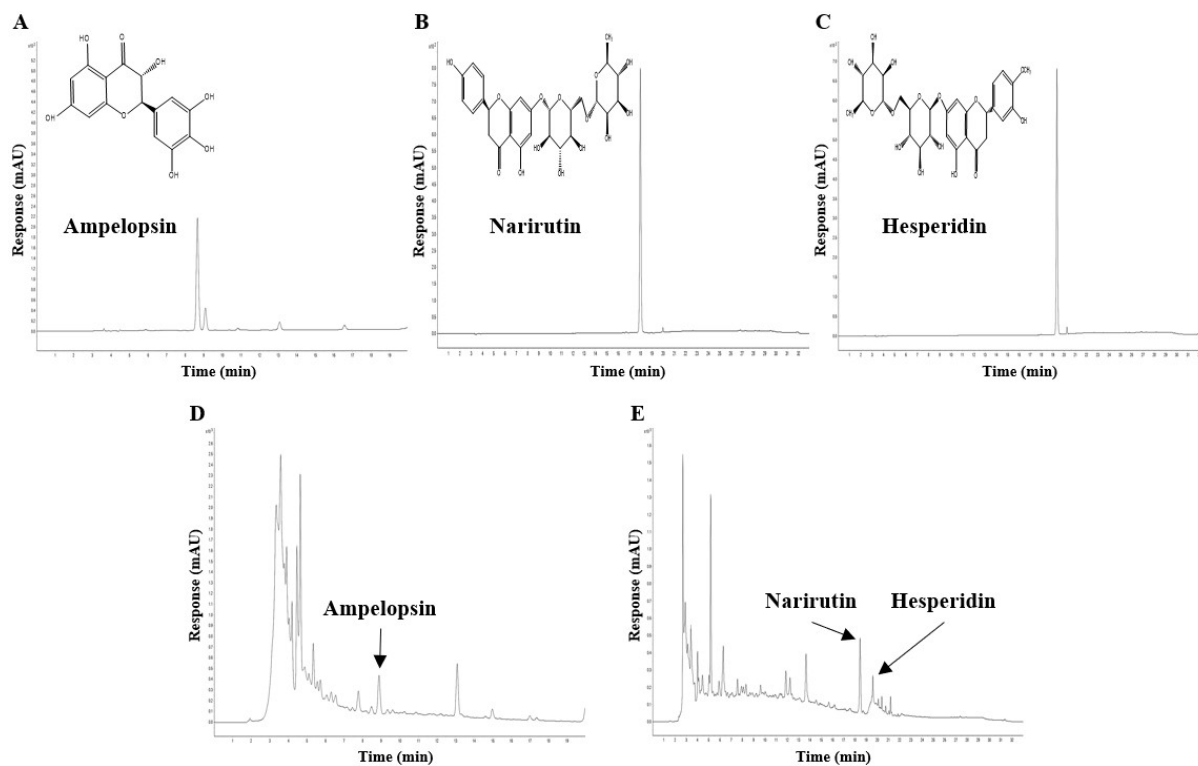

**Fig. S2** HPLC chromatogram of the SKE. (A) Standard ampelopsin; (B) standard narirutin; (C) standard hesperidin; (D) chromatogram of SKE showing the presence of ampelopsin; (E) chromatogram of SKE indicating the presence of narirutin and hesperidin. SKE: *Citrus unshiu* fruit vinegar and *Hovenia dulcis* fruit extract mixture
